# Supplementary material for: teiresias, a Fruitless target gene encoding an immunoglobulin-superfamily transmembrane protein, is required for neuronal feminization in Drosophila
Source: PubMed Central journal article supplement (PMC7578032; doi:10.1038/s42003-020-01327-z), 2020-10-21
Supplement: 42003_2020_1327_MOESM3_ESM.pdf [file 42003_2020_1327_MOESM3_ESM.pdf]

## **Description of additional supplementary items**

### **SUPPLEMENTARY DATA FILE LEGENDS**

**Supplementary Data 1.** A list of query nucleotide sequences and the results of *in silico* similarity searches for genes with the Pal1 sequence.

**Supplementary Data 2.** Raw data used to construct graphs of figures shown in this paper.
